# Supplementary material for: Combined Effect of Fatty Diet and Cognitive Decline on Brain Metabolism, Food Intake, Body Weight, and Counteraction by Intranasal Insulin Therapy in 3×Tg Mice
Source: PubMed Central journal article supplement (PMC6509878; doi:10.3389/fncel.2019.00188), 2019-05-03
Supplement: Data_Sheet_1.pdf [file Data_Sheet_1.pdf]

**Combined effect of fatty diet and cognitive decline on brain metabolism, food intake, body weight, and counteraction by intranasal insulin therapy in 3xTg mice**

Elena Sanguinetti<sup>1,2\*</sup>, Maria Angela Guzzardi<sup>1\*</sup>, Daniele Panetta<sup>1</sup>, Maria Tripodi<sup>1</sup>, Vincenzo De Sena<sup>1</sup>, Mauro Quaglierini<sup>1</sup>, Silvia Burchielli<sup>3</sup>, Piero A. Salvadori<sup>1</sup>, Patricia Iozzo<sup>1</sup>

\*Equal first authorship contribution

<sup>1</sup>Institute of Clinical Physiology, National Research Council (CNR), Pisa, Italy

<sup>2</sup>Scuola Superiore di Studi Universitari Sant'Anna, Pisa, Italy

<sup>3</sup>Fondazione Toscana Gabriele Monasterio (FTGM), Pisa, Italy

Correspondence to: Patricia Iozzo, MD, PhD, Institute of Clinical Physiology, National Research Council (CNR), via Moruzzi 1, Pisa, 56124, Italy; phone: +39-050-3152789, Email: [patricia.iozzo@ifc.cnr.it](mailto:patricia.iozzo@ifc.cnr.it).

**Supplementary Material (SM)**

SM Table 1: two-way ANOVA for the effects of diet and genotype in group comparisons in brain regions from PET imaging

|                                     | <b>Diet</b>       | <b>Genotype</b>   | <b>Diet*Genotype</b> |
|-------------------------------------|-------------------|-------------------|----------------------|
| <b>8 months</b>                     |                   |                   |                      |
| <i><b>Fractional extraction</b></i> |                   |                   |                      |
| Frontal cortex                      | 0.759             | <b>0.002</b>      | 0.894                |
| Medial cortex                       | 0.956             | <b>&lt;0.0005</b> | 0.779                |
| Dorsal striatum                     | 0.693             | <b>&lt;0.0005</b> | 0.908                |
| Globus pallidus                     | 0.551             | <b>&lt;0.0005</b> | 0.843                |
| Thalamus                            | 0.292             | <b>&lt;0.0005</b> | 0.741                |
| Hypothalamus                        | 0.330             | <b>&lt;0.0005</b> | 0.935                |
| Hippocampus                         | 0.520             | <b>&lt;0.0005</b> | 0.733                |
| Temporal cortex                     | 0.922             | <b>&lt;0.0005</b> | 0.502                |
| Amygdala                            | 0.482             | <b>&lt;0.0005</b> | 0.784                |
| Sensory cortex                      | 0.730             | <b>&lt;0.0005</b> | 0.570                |
| Cerebellum                          | 0.108             | <b>&lt;0.0005</b> | 0.609                |
| <i><b>Glucose uptake</b></i>        |                   |                   |                      |
| Frontal cortex                      | <b>&lt;0.0005</b> | 0.274             | 0.426                |
| Medial cortex                       | <b>&lt;0.0005</b> | 0.209             | 0.510                |
| Dorsal striatum                     | <b>&lt;0.0005</b> | 0.054             | 0.330                |
| Globus pallidus                     | <b>&lt;0.0005</b> | <b>0.027</b>      | 0.298                |
| Thalamus                            | <b>&lt;0.0005</b> | <b>0.047</b>      | 0.372                |
| Hypothalamus                        | <b>&lt;0.0005</b> | 0.064             | 0.261                |
| Hippocampus                         | <b>&lt;0.0005</b> | 0.140             | 0.482                |
| Temporal cortex                     | <b>&lt;0.0005</b> | <b>0.038</b>      | 0.115                |
| Amygdala                            | <b>&lt;0.0005</b> | 0.114             | 0.463                |
| Sensory cortex                      | <b>&lt;0.0005</b> | <b>0.033</b>      | 0.391                |
| Cerebellum                          | <b>&lt;0.0005</b> | <b>0.051</b>      | 0.470                |
| <b>14 months</b>                    |                   |                   |                      |
| <i><b>Fractional extraction</b></i> |                   |                   |                      |
| Frontal cortex                      | 0.342             | <b>&lt;0.0005</b> | 0.661                |
| Medial cortex                       | 0.197             | <b>&lt;0.0005</b> | 0.486                |
| Dorsal striatum                     | 0.421             | <b>&lt;0.0005</b> | 0.600                |
| Globus pallidus                     | 0.598             | 0.093             | 0.780                |
| Thalamus                            | 0.331             | <b>0.001</b>      | 0.939                |
| Hypothalamus                        | 0.622             | <b>0.001</b>      | 0.754                |
| Hippocampus                         | 0.311             | <b>0.003</b>      | 0.919                |
| Temporal cortex                     | 0.355             | <b>0.009</b>      | 0.919                |
| Amygdala                            | 0.363             | <b>0.009</b>      | 0.797                |
| Sensory cortex                      | 0.325             | <b>&lt;0.0005</b> | 0.828                |
| Cerebellum                          | 0.429             | <b>0.002</b>      | 0.862                |
| <i><b>Glucose uptake</b></i>        |                   |                   |                      |
| Frontal cortex                      | 0.646             | 0.067             | 0.917                |
| Medial cortex                       | 0.409             | 0.115             | 0.932                |
| Dorsal striatum                     | 0.624             | 0.081             | 0.916                |
| Globus pallidus                     | 0.444             | <b>0.001</b>      | 0.902                |
| Thalamus                            | 0.461             | 0.139             | 0.811                |
| Hypothalamus                        | 0.628             | 0.132             | 0.656                |
| Hippocampus                         | 0.429             | 0.244             | 0.804                |

|                 |       |       |       |
|-----------------|-------|-------|-------|
| Temporal cortex | 0.441 | 0.509 | 0.801 |
| Amygdala        | 0.460 | 0.205 | 0.990 |
| Sensory cortex  | 0.533 | 0.099 | 0.788 |
| Cerebellum      | 0.480 | 0.198 | 0.763 |

SM Table 2: Mixed design ANOVA for the effects of acute intranasal insulin on brain regions from PET imaging

|                              | Acute insulin     | Acute insulin<br>* diet | Acute insulin<br>* genotype | Acute insulin<br>* diet * genotype |
|------------------------------|-------------------|-------------------------|-----------------------------|------------------------------------|
| <b>8 months</b>              |                   |                         |                             |                                    |
| <i>Fractional extraction</i> |                   |                         |                             |                                    |
| Frontal cortex               | 0.064             | 0.142                   | 0.616                       | 0.854                              |
| Medial cortex                | <b>0.025</b>      | 0.794                   | 0.265                       | 0.469                              |
| Dorsal striatum              | 0.090             | 0.802                   | 0.499                       | 0.563                              |
| Globus pallidus              | 0.977             | 0.820                   | 0.415                       | 0.736                              |
| Thalamus                     | 0.566             | 0.587                   | 0.759                       | 0.652                              |
| Hypothalamus                 | 0.539             | 0.816                   | 0.468                       | 0.563                              |
| Hippocampus                  | 0.877             | 0.875                   | 0.679                       | 0.559                              |
| Temporal cortex              | 0.203             | 0.310                   | 0.292                       | 0.134                              |
| Amygdala                     | 0.573             | 0.965                   | 0.885                       | 0.369                              |
| Sensory cortex               | <b>0.004</b>      | 0.077                   | 0.057                       | 0.101                              |
| Cerebellum                   | <b>0.011</b>      | 0.858                   | 0.255                       | 0.969                              |
| <i>Glucose uptake</i>        |                   |                         |                             |                                    |
| Frontal cortex               | <b>&lt;0.0005</b> | 0.197                   | <b>0.009</b>                | <b>0.053</b>                       |
| Medial cortex                | <b>&lt;0.0005</b> | 0.816                   | 0.106                       | 0.274                              |
| Dorsal striatum              | <b>&lt;0.0005</b> | 0.698                   | <b>0.003</b>                | <b>0.046</b>                       |
| Globus pallidus              | <b>&lt;0.0005</b> | 0.981                   | <b>0.001</b>                | <b>0.037</b>                       |
| Thalamus                     | <b>&lt;0.0005</b> | 0.785                   | <b>0.001</b>                | <b>0.024</b>                       |
| Hypothalamus                 | <b>&lt;0.0005</b> | 0.793                   | <b>&lt;0.0005</b>           | <b>0.003</b>                       |
| Hippocampus                  | <b>&lt;0.0005</b> | 0.630                   | <b>0.001</b>                | <b>0.028</b>                       |
| Temporal cortex              | <b>&lt;0.0005</b> | 0.288                   | <b>0.001</b>                | <b>0.001</b>                       |
| Amygdala                     | <b>&lt;0.0005</b> | 0.650                   | <b>0.003</b>                | <b>0.059</b>                       |
| Sensory cortex               | <b>0.001</b>      | 0.097                   | <b>&lt;0.0005</b>           | <b>0.001</b>                       |
| Cerebellum                   | <b>&lt;0.0005</b> | 0.405                   | <b>&lt;0.0005</b>           | <b>0.016</b>                       |
| <b>14 months</b>             |                   |                         |                             |                                    |
| <i>Fractional extraction</i> |                   |                         |                             |                                    |
| Frontal cortex               | 0.245             | <b>0.027</b>            | 0.577                       | 0.233                              |
| Medial cortex                | 0.059             | 0.220                   | 0.318                       | 0.310                              |
| Dorsal striatum              | 0.122             | <b>0.052</b>            | 0.858                       | 0.093                              |
| Globus pallidus              | 0.385             | <b>0.057</b>            | 0.781                       | <b>0.062</b>                       |
| Thalamus                     | 0.613             | <b>0.024</b>            | 0.599                       | 0.134                              |
| Hypothalamus                 | 0.723             | 0.152                   | 0.220                       | 0.103                              |
| Hippocampus                  | 0.964             | 0.161                   | 0.632                       | 0.343                              |
| Temporal cortex              | 0.101             | <b>0.011</b>            | 0.077                       | 0.203                              |
| Amygdala                     | 0.664             | <b>0.056</b>            | 0.793                       | 0.404                              |
| Sensory cortex               | 0.107             | 0.353                   | 0.628                       | 0.311                              |
| Cerebellum                   | 0.062             | 0.158                   | 0.223                       | 0.315                              |
| <i>Glucose uptake</i>        |                   |                         |                             |                                    |
| Frontal cortex               | <b>&lt;0.0005</b> | 0.656                   | 0.133                       | 0.149                              |
| Medial cortex                | <b>0.010</b>      | 0.538                   | 0.589                       | 0.178                              |
| Dorsal striatum              | <b>&lt;0.0005</b> | 0.646                   | 0.162                       | 0.135                              |
| Globus pallidus              | <b>&lt;0.0005</b> | 0.760                   | 0.203                       | 0.189                              |
| Thalamus                     | <b>&lt;0.0005</b> | 0.966                   | 0.145                       | 0.120                              |
| Hypothalamus                 | <b>&lt;0.0005</b> | 0.695                   | 0.123                       | 0.140                              |

|                 |                   |       |       |              |
|-----------------|-------------------|-------|-------|--------------|
| Hippocampus     | <b>&lt;0.0005</b> | 0.843 | 0.185 | <b>0.072</b> |
| Temporal cortex | <b>&lt;0.0005</b> | 0.845 | 0.989 | <b>0.094</b> |
| Amygdala        | <b>0.004</b>      | 0.936 | 0.335 | 0.328        |
| Sensory cortex  | <b>0.009</b>      | 0.477 | 0.494 | 0.124        |
| Cerebellum      | <b>&lt;0.0005</b> | 0.991 | 0.171 | <b>0.080</b> |

SM Figure 1

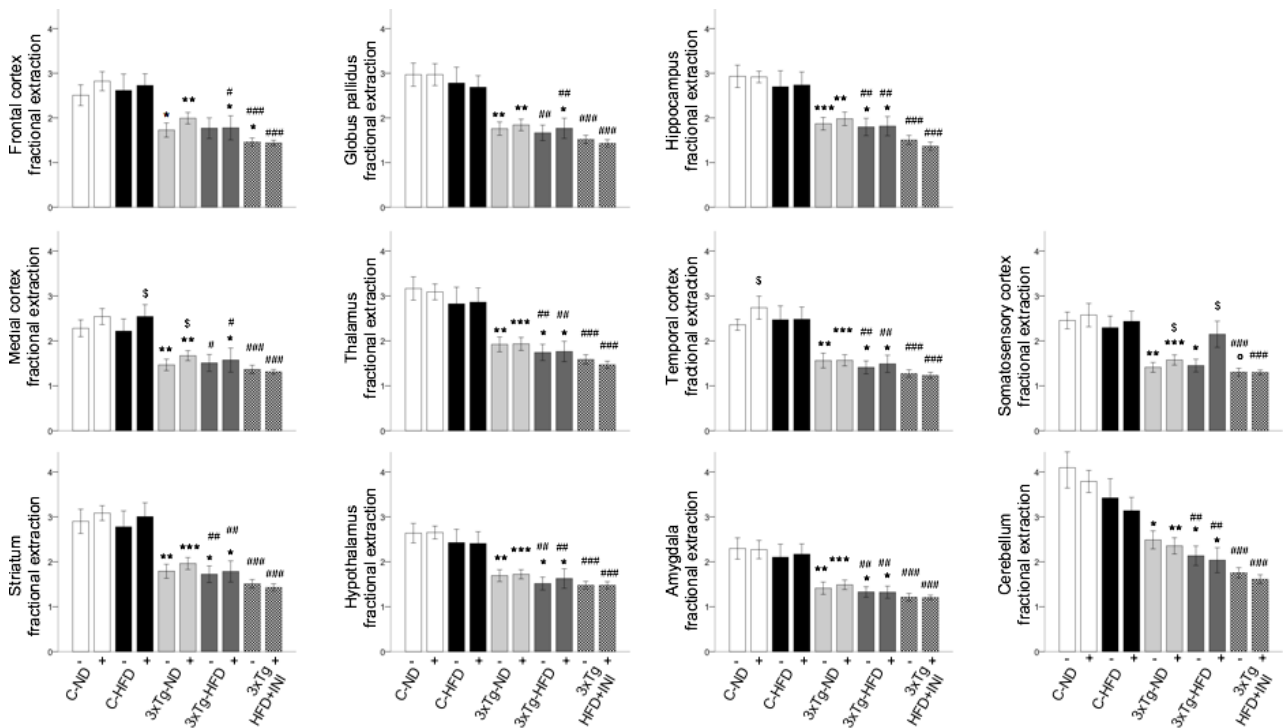

**SM Figure 1.** These data integrate results given in Fig. 6 of the main text, by primarily showing diet-induced increase in cerebral glucose uptake (GU) in all brain regions at 8 months of age, and the blunting effect of 3xTg background, together with the lack of response to acute intranasal insulin in 3xTg-HFD mice. Data are presented as mean±SEM. Sample sizes are given in Table 1. #p<0.05 vs ND control group (reference group), ^p<0.05 or less (^) HFD vs ND (within-strain), °p<0.05 or less (°) for treated 3xTg-HFD+INI vs untreated 3Tg HFD, \$p<0.05 or less (\$) acute intranasal insulin vs baseline PET scans (-/+) (within-group, paired tests).

SM Figure 2

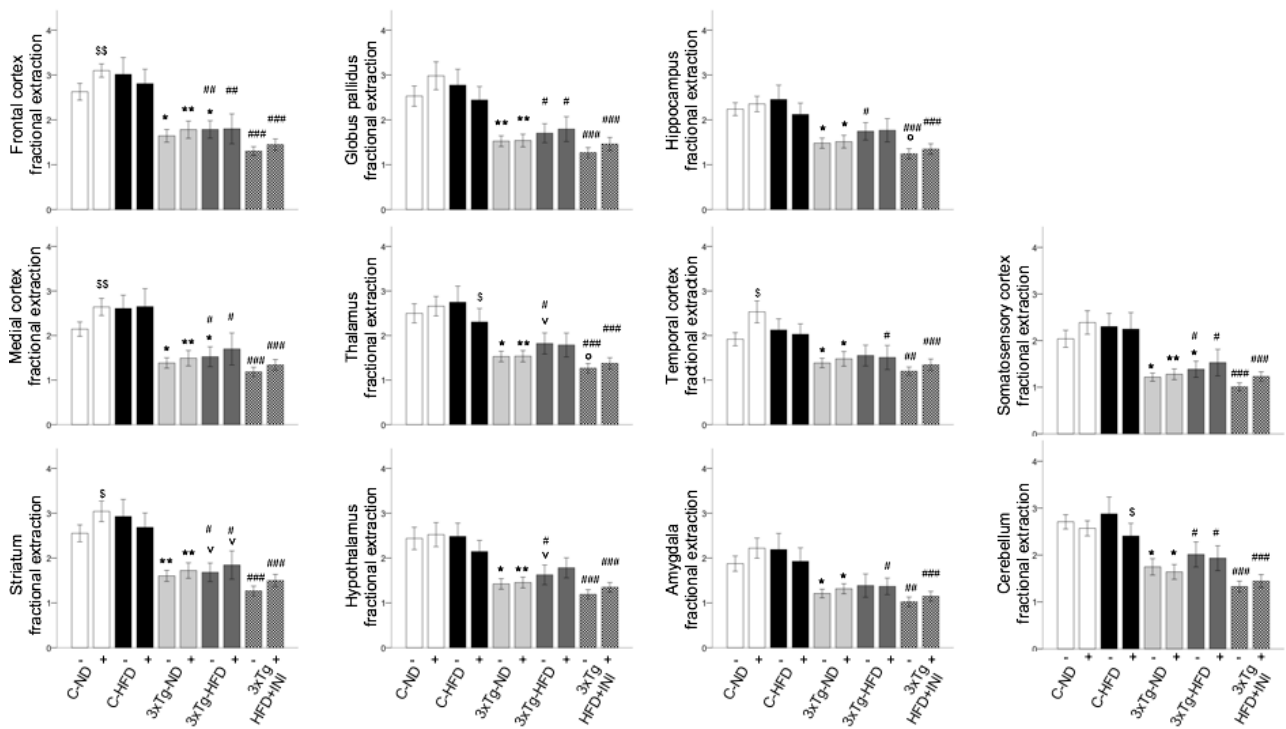

**SM Figure 2.** These data integrate results given in Fig. 6 of the main text, by showing a reduction in cerebral fractional glucose extraction involving all brain regions in all 3xTg groups at 14 months of age, and being mostly unaffected by HFD or chronic INI therapy. Acute intranasal insulin had very minor effects on fractional extraction. Data are presented as mean±SEM. Sample sizes are given in Table 1. \*p<0.05 or less (\*\* or vp=0.06 ND-ND and HFD-HFD (between strains), #p<0.05 or less (##, ####) vs ND control group (reference group), °p<0.05 for treated 3xTg-HFD+INI vs untreated 3Tg HFD, \$p<0.05 or less (\$\$) acute intranasal insulin vs baseline PET scans (-/+) (within-group, paired tests).

SM Figure 3

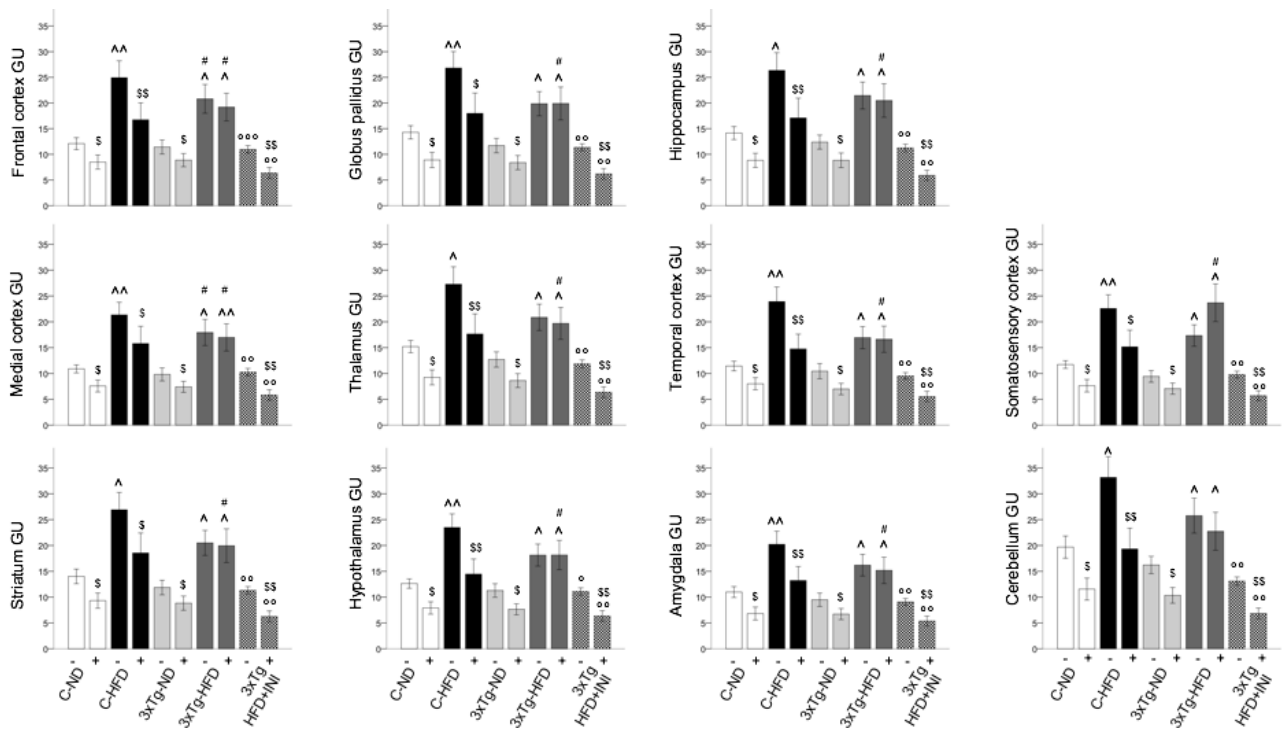

**SM Figure 3.** These data integrate results given in Fig. 6 of the main text, by primarily showing diet-induced increase in cerebral glucose uptake (GU) in all brain regions at 8 months of age, and the blunting effect of 3xTg background, together with the lack of response to acute intranasal insulin in 3xTg-HFD mice. Data are presented as mean±SEM. Sample sizes are given in Table 1. #p<0.05 vs ND control group (reference group), ^p<0.05 or less (^^) HFD vs ND (within-strain), °p<0.05 or less (°°) for treated 3xTg-HFD+INI vs untreated 3Tg HFD, \$p<0.05 or less (\$\$) acute intranasal insulin vs baseline PET scans (-/+) (within-group, paired tests).



SM Figure 4

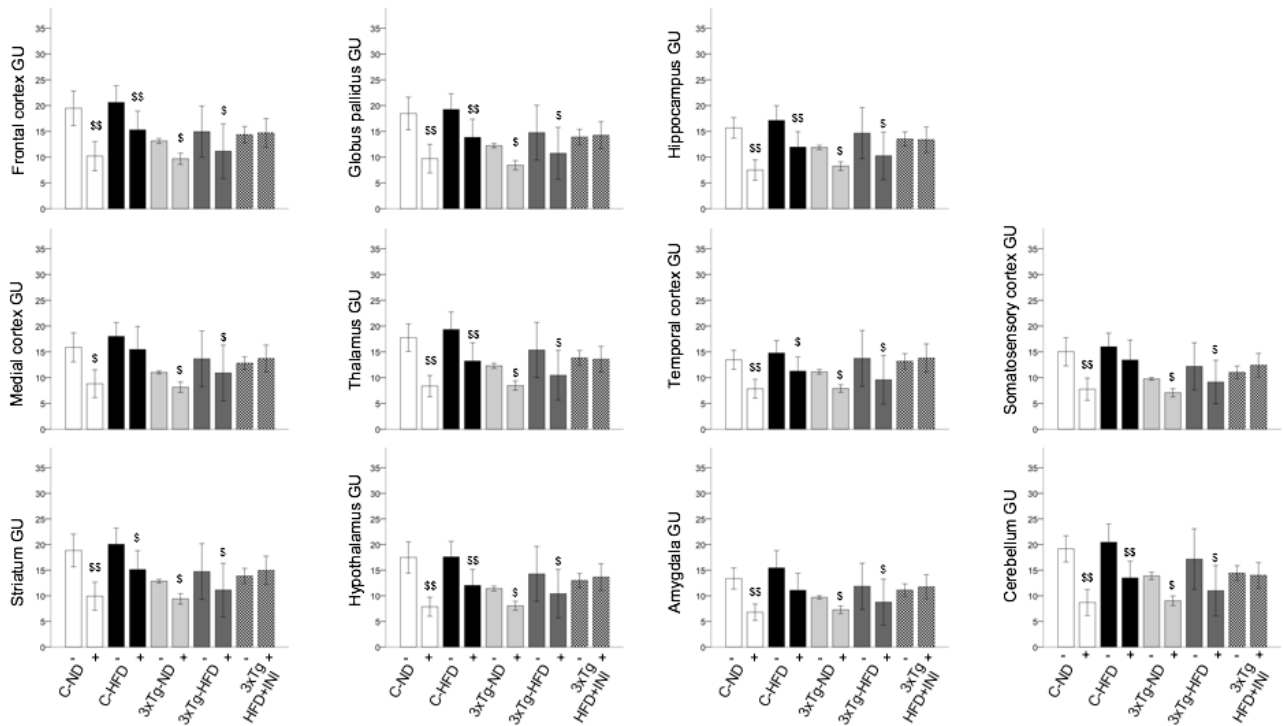

**SM Figure 4.** These data integrate results given in Fig. 6 of the main text, by primarily showing that a (non-significant) tendency towards reduced cerebral glucose uptake (GU) in 3xTg groups at 14 months of age, being mostly unaffected by HFD or chronic INI therapy. Acute intranasal insulin had more evident effects in ND mice, blunted effects in HFD and 3xTg-ND groups, and no effects in 3xTg-HFD+INI mice, indicating that cerebral insulin resistance, as induced by prolonged insulin treatment involves all brain regions. Data are presented as mean $\pm$ SEM. Sample sizes are given in Table 1. \$ $p$ <0.05 or less (\$\$) acute intranasal insulin vs baseline PET scans (-/+) (within-group, paired tests).
